# Supplementary material for: Conventional and technical diving surveys reveal elevated biomass and differing fish community composition from shallow and upper mesophotic zones of a remote United States coral reef
Source: PLoS One. 2017 Nov 21;12(11):e0188598. doi: 10.1371/journal.pone.0188598 (PMC5697833; doi:10.1371/journal.pone.0188598)
Supplement: S1 Data — (CSV) [file pone.0188598.s002.csv]

fish density 100m2 2010 2011 2012
survey_index	Cantherhines macrocerus	Paranthias furcifer	Diodon holocanthus	Chaetodon striatus	Sphoeroides spengleri	Carangoides ruber	Stegastes leucostictus	Stegastes partitus	Melichthys niger	Mycteroperca bonaci	Caranx lugubris	Myripristis jacobus	Ptereleotris calliura	Holacanthus bermudensis	Chromis cyanea	Caranx crysos	Acanthurus coeruleus	Thalassoma bifasciatum	Synodus saurus	Inermia vittata	Emmelichthyops atlanticus	Coryphopterus glaucofraenum	Chromis multilineata	Sparisoma radians	Apogon UNK	Carcharhinus perezi	Centropyge argi	Kyphosus sectator	Halichoeres maculipinna	Stegastes variabilis	Coryphopterus dicrus	Cephalopholis fulva	Haemulon melanurum	Clepticus parrae	Caranx hippos	Lutjanus cyanopterus	Sargocentron bullisi	Acanthurus chirurgus	Lutjanus jocu	Stegastes adustus	Pomacanthus paru	Manta birostris	Gymnothorax miliaris	Canthigaster jamestyleri	Gnatholepis thompsoni	Balistes capriscus	Lutjanus griseus	Cephalopholis cruentata	Sphyraena barracuda
5887	0	65	0	0	0	0	0	4	0	0	0	0	0	1	0	0	0	8	0	0	0	0	5	0	0	0	0	3	0	0	0	0	0	3	0	0	0	0	0	0	0	0	0	0	2	0	1	0	0
5888	0	53	0	0	0	1	0	7	0	0	0	0	0	0	8	0	3	8	0	0	0	0	43	0	0	0	0	15	0	0	0	0	0	0	0	0	0	0	0	0	0	0	0	0	0	0	5	0	0
5889	0	130	0	0	0	0	0	1	0	0	0	0	0	0	4	0	0	5	0	0	0	0	18	0	0	0	0	0	0	0	0	0	0	26	0	0	0	3	0	0	0	0	0	0	0	0	8	0	1
5890	0	150	0	0	0	0	0	25	20	0	0	0	0	0	23	0	4	17	0	0	0	0	100	0	0	0	0	10	0	0	0	0	0	0	0	0	0	0	0	0	0	0	0	0	0	0	0	0	0
5891	0	0	0	0	0	0	0	4	0	0	0	0	0	0	1	0	1	8	0	0	0	0	30	0	0	0	0	0	0	4	0	0	0	0	0	0	0	0	0	0	0	0	0	0	0	0	0	1	1
5892	0	55	0	0	0	0	0	7	0	0	0	0	0	0	6	0	2	15	0	0	0	0	39	0	0	0	0	1	0	0	0	0	0	0	0	0	0	0	0	0	0	0	0	0	0	0	1	0	2
5893	0	51	0	0	0	0	0	9	0	0	0	0	0	0	8	0	0	25	0	0	0	1	19	0	0	0	0	0	0	4	0	0	0	0	0	0	0	2	0	0	0	0	0	0	1	0	0	3	0
5894	0	25	0	0	0	0	0	4	3	0	0	0	0	0	0	0	2	6	0	0	0	0	10	0	0	0	0	17	0	5	0	2	0	0	0	0	0	0	0	0	0	0	0	0	0	0	0	0	1
5895	0	28	0	0	0	0	0	4	5	0	0	0	0	0	0	0	1	20	0	0	0	0	28	0	0	0	0	4	0	0	0	0	0	1	0	0	0	0	0	0	0	0	0	0	0	0	0	1	0
5896	0	138	0	0	0	2	0	3	0	0	0	0	0	0	4	0	3	20	0	0	0	0	83	0	0	0	0	14	3	0	0	0	0	2	0	0	0	2	0	0	1	0	0	0	0	0	2	2	0
5897	0	29	0	0	0	0	0	4	0	0	0	0	0	0	2	0	2	31	0	0	0	0	32	0	0	0	0	8	0	4	0	0	0	0	0	0	0	0	0	0	0	0	0	0	0	0	0	0	0
5898	0	100	0	0	0	0	0	10	3	0	0	0	0	0	0	0	6	24	0	0	0	0	60	0	0	0	0	5	0	0	0	0	0	10	0	0	0	0	0	0	0	0	0	0	0	0	0	1	1
5899	0	27	0	0	0	0	0	3	0	0	0	0	0	0	6	0	2	8	0	0	0	0	16	0	0	0	0	2	0	0	0	1	0	0	0	0	0	0	0	0	0	0	0	0	0	0	2	0	0
5900	0	85	0	0	0	5	0	4	1	0	0	0	0	0	0	0	4	15	0	0	0	0	65	0	0	0	0	3	0	0	0	0	0	0	0	0	0	0	0	0	0	0	0	0	0	0	0	0	1
5901	0	200	0	0	0	0	0	10	0	0	0	0	0	0	0	0	2	20	0	0	0	0	150	0	0	0	0	2	0	0	0	0	0	11	0	0	0	0	0	0	0	0	0	0	0	0	8	0	0
5902	0	4	0	0	0	0	0	2	0	0	0	0	0	0	1	0	4	25	0	0	0	0	10	0	0	0	0	0	0	0	0	0	0	0	0	0	0	0	0	0	0	0	0	0	0	0	0	1	0
5903	0	31	0	0	0	0	0	5	0	0	0	0	0	0	0	0	2	28	0	0	0	0	3	0	0	0	0	0	0	4	0	0	0	0	0	0	0	2	0	0	0	0	0	0	0	0	0	1	0
5904	0	26	0	0	0	0	0	3	0	0	0	0	0	0	3	0	0	4	0	0	0	0	22	0	0	0	0	0	0	2	0	0	0	0	0	0	0	0	0	0	2	0	0	0	0	0	1	2	0
5905	0	22	0	0	0	0	0	4	0	0	0	0	0	0	0	0	3	23	0	0	0	0	60	0	0	0	0	6	0	2	0	0	0	1	0	0	0	1	0	5	0	0	0	0	0	0	0	0	1
5906	0	0	0	0	0	0	0	3	0	0	0	0	0	0	0	0	3	12	0	0	0	0	25	0	0	0	0	0	0	0	0	0	0	0	0	0	0	1	0	0	0	0	0	0	0	0	1	0	0
5907	0	7	0	0	0	0	0	11	0	2	0	0	0	0	15	0	5	25	0	0	0	0	40	0	0	0	0	2	0	10	0	0	0	3	0	0	0	0	0	0	0	0	0	0	0	0	0	0	0
5908	0	44	0	0	0	0	3	3	0	0	0	0	0	0	1	0	7	10	0	0	0	0	57	0	0	0	0	5	0	0	0	0	0	0	0	0	0	0	2	0	1	0	0	0	0	0	0	0	3
5909	0	55	0	0	0	0	0	7	4	0	0	0	0	0	3	0	5	13	0	0	0	0	75	0	0	0	0	1	0	0	0	0	0	19	0	0	0	0	0	0	0	0	0	0	1	0	1	0	3
5910	0	40	0	0	0	0	0	0	3	0	0	0	0	0	15	0	6	18	0	0	0	0	150	0	0	0	0	0	0	5	0	0	0	2	0	0	0	0	0	0	2	0	0	0	0	0	0	0	2
5911	0	69	0	0	0	0	1	12	0	2	0	0	0	0	12	0	8	8	0	0	0	0	44	0	0	0	0	15	0	0	0	0	0	0	0	0	0	0	1	0	0	0	0	0	0	0	0	1	5
5912	0	7	0	0	0	0	0	3	0	0	0	0	0	0	2	0	1	17	0	0	0	0	15	0	0	0	0	0	0	0	0	0	0	0	0	0	0	0	0	0	0	0	0	0	0	0	0	0	1
5913	0	100	0	0	0	0	0	10	0	0	0	0	0	0	15	0	1	7	0	0	0	0	225	0	0	0	0	3	0	0	0	0	0	0	0	0	0	0	0	0	0	1	0	0	0	0	1	0	4
5914	0	20	0	0	0	0	0	5	0	0	0	0	0	0	0	0	7	110	0	0	0	0	255	0	0	0	0	25	0	1	0	0	0	3	0	0	0	1	1	0	0	0	0	0	0	0	0	2	2
5915	0	46	0	0	0	2	3	16	2	0	0	0	0	0	7	0	9	28	0	0	0	0	105	0	0	0	0	0	0	0	0	0	0	0	0	0	0	0	0	0	0	0	0	0	0	0	0	2	5
5916	0	3	0	0	0	0	0	6	0	0	0	0	0	0	3	0	2	50	0	0	0	0	64	0	0	0	0	0	0	5	0	0	0	3	0	0	0	0	0	0	0	0	0	0	0	0	0	0	0
5917	0	20	0	0	0	0	1	10	0	0	0	0	0	0	2	0	5	55	0	0	0	0	95	0	0	0	0	1	0	10	0	1	0	0	0	0	0	0	0	0	0	0	0	0	0	0	0	0	0
5918	0	77	0	0	0	0	0	0	0	0	0	0	0	0	17	0	6	8	0	0	0	0	62	0	0	0	0	1	0	0	0	1	0	0	0	0	0	0	0	0	1	0	0	0	0	0	0	3	0
5919	0	400	0	0	0	0	0	12	1	0	0	0	0	0	2	0	3	35	0	0	0	0	70	0	0	0	0	2	1	1	0	0	0	0	0	0	0	1	0	0	0	0	0	0	0	0	0	1	2
5920	0	558	0	0	0	3	0	3	0	0	0	0	0	0	8	0	9	33	0	0	0	0	350	0	0	0	0	123	0	2	0	0	0	930	0	0	0	1	1	0	0	0	0	0	0	0	0	0	2
5921	0	150	0	0	0	0	0	15	0	0	0	0	0	0	0	0	3	50	0	0	0	0	100	0	0	0	0	75	0	0	0	0	0	1	0	0	0	0	0	0	2	0	0	0	0	0	1	0	2
5922	1	40	0	0	0	8	0	26	1	0	0	0	0	0	0	0	7	52	0	0	0	0	321	0	0	0	0	1	1	2	0	0	0	1	0	0	0	1	0	0	0	0	0	0	0	0	0	0	3
5923	0	9	0	0	0	1	2	1	0	0	0	0	0	0	3	0	6	10	0	0	0	0	38	0	0	0	0	31	0	0	0	0	0	252	0	0	0	0	0	0	4	0	0	0	0	0	0	0	1
5924	0	61	0	0	0	0	0	2	3	3	0	0	0	0	1	0	4	5	0	0	0	0	29	0	0	0	0	1	0	0	0	2	0	6	0	0	0	1	2	0	2	0	0	0	0	0	5	0	0
5925	0	10	0	0	0	1	6	16	5	0	0	0	0	0	2	0	7	20	0	0	0	0	0	0	0	0	0	0	0	0	0	0	0	0	0	0	0	0	0	0	0	0	0	0	0	0	0	0	1
5926	0	48	0	0	0	0	0	5	2	0	0	0	0	0	1	0	3	4	0	0	0	0	73	0	0	0	0	10	0	1	0	0	0	102	0	0	0	1	0	0	0	0	0	0	0	0	0	1	0
5927	0	0	0	0	0	0	0	2	0	0	0	0	0	0	0	0	0	9	0	0	0	0	0	0	0	0	0	12	0	3	0	0	0	0	0	0	0	0	1	0	0	0	0	0	0	0	0	1	0
5928	0	50	0	0	0	0	0	11	0	0	2	0	0	0	0	0	0	41	0	0	0	0	0	0	0	0	0	0	0	5	0	0	0	0	0	0	0	14	0	0	3	0	0	0	0	0	0	1	0
5929	0	900	0	0	0	3	0	15	2	0	2	0	0	0	0	0	2	50	0	0	0	0	300	0	0	0	0	20	0	0	0	0	0	0	0	0	0	0	0	0	2	0	0	0	0	0	0	0	0
5930	0	10	0	0	0	0	0	4	3	0	0	0	0	0	2	0	4	16	0	40	0	0	0	0	0	0	0	0	0	1	0	1	0	15	0	0	0	0	0	0	2	0	0	0	0	0	1	0	0
5931	0	89	0	0	0	1	0	20	0	0	0	0	0	0	4	0	0	35	0	0	0	0	0	0	0	0	0	2	0	5	0	0	0	0	0	0	0	6	0	0	2	0	0	1	0	0	0	3	1
5932	0	252	0	0	0	20	0	7	4	0	2	0	0	0	0	0	3	12	0	0	0	0	0	0	0	0	0	25	0	0	0	0	0	0	0	0	0	0	1	0	0	0	0	0	0	0	0	0	1
5933	0	33	0	0	0	0	0	1	1	0	1	1	0	0	3	0	2	28	0	0	0	0	51	0	0	0	0	0	0	0	0	0	0	38	0	0	0	0	0	0	0	0	0	0	0	0	4	2	0
5934	0	2000	0	0	0	65	0	25	0	0	0	0	0	0	0	0	0	25	0	0	0	0	22	0	0	0	0	0	0	0	0	0	0	14	0	0	0	0	4	0	0	0	0	0	0	0	0	1	1
5935	0	4	0	0	0	0	0	0	0	0	0	0	0	0	0	0	2	7	0	0	0	0	4	0	0	0	0	4	0	4	0	0	0	80	0	0	0	0	4	0	0	0	0	0	0	0	4	0	0
5936	0	79	0	0	0	2	0	1	0	0	0	0	0	0	0	0	4	9	0	0	0	0	50	0	0	0	0	120	0	3	0	0	0	0	0	0	0	0	0	0	1	0	0	0	0	0	11	1	0
5937	0	24	0	0	0	1	0	12	14	0	0	0	0	0	4	0	3	22	0	0	0	0	23	0	0	0	0	0	0	0	0	0	0	0	0	0	0	0	1	0	0	0	0	0	1	0	3	0	2
5938	0	202	0	0	0	60	0	5	0	0	0	0	0	0	3	0	3	18	0	0	0	0	51	0	0	0	0	90	0	0	0	0	0	160	0	0	0	0	0	0	0	0	0	0	0	0	1	0	3
5939	0	1000	0	0	0	0	0	5	1	0	0	0	0	0	0	0	0	42	0	0	0	0	30	0	0	0	0	210	0	1	0	0	0	800	0	0	0	0	0	0	0	0	0	0	0	0	0	1	1
5940	0	164	0	0	0	0	1	3	2	0	0	0	0	0	6	0	3	13	0	0	0	0	14	0	0	0	0	0	0	0	0	0	0	50	0	0	0	0	1	0	0	0	0	0	0	0	0	1	1
5941	0	6	0	0	0	0	0	1	5	0	0	0	0	0	2	0	1	25	0	0	0	0	17	0	0	0	0	0	0	0	0	0	0	2	0	0	0	0	0	0	0	0	0	0	0	0	4	0	1
5942	0	1	0	0	0	0	0	10	1	0	0	0	0	0	5	0	2	74	0	0	0	0	37	0	0	0	0	0	5	5	0	0	0	0	0	0	0	5	0	0	0	0	0	0	0	0	2	1	0
5943	0	7	0	0	0	0	0	15	2	0	0	0	0	0	7	0	3	17	0	0	0	0	15	0	0	0	0	1	0	0	0	0	0	0	0	0	0	2	0	0	0	0	0	0	0	0	1	1	7
5944	0	23	0	2	0	0	0	6	0	0	0	0	0	0	0	0	0	38	0	0	0	0	17	0	0	0	0	0	1	1	0	0	0	1	0	0	0	1	0	0	0	0	0	0	9	0	1	0	2
5945	0	50	0	0	0	0	0	6	2	0	0	0	0	0	0	0	3	12	0	0	0	0	100	0	0	0	0	325	0	0	0	0	0	9	0	0	0	0	2	0	0	0	0	0	0	0	2	0	2
5946	0	68	0	0	0	0	0	17	0	0	0	0	0	0	5	0	1	50	0	0	0	0	150	0	0	0	0	0	0	0	0	0	0	54	0	0	0	0	0	0	0	0	0	0	0	0	4	0	1
5947	0	60	0	0	0	0	0	0	5	0	3	0	0	0	0	0	0	25	0	0	0	0	75	0	0	0	0	0	0	0	0	0	0	870	0	0	0	0	4	0	2	0	0	0	0	0	6	1	2
5948	0	6	0	0	0	0	0	2	1	0	0	0	0	0	5	0	3	10	0	0	0	0	24	0	0	0	0	203	0	1	0	0	0	7	0	0	0	0	1	0	0	0	0	0	0	0	0	2	2
5949	0	12	0	0	0	1	0	2	0	0	0	1	0	0	2	0	5	77	0	0	0	0	117	0	0	0	0	49	0	1	0	0	0	28	0	0	0	2	0	0	0	0	0	0	0	0	5	1	0
5950	0	1	0	0	0	0	0	1	1	0	0	0	0	0	0	0	1	8	0	0	0	0	37	0	0	0	0	0	0	3	0	0	0	0	0	0	0	0	0	0	0	0	0	0	0	0	2	3	0
5951	0	4	0	2	0	0	0	55	1	0	0	0	0	0	2	0	6	47	0	0	0	0	75	0	0	0	0	0	0	0	0	0	0	17	0	0	0	0	0	0	0	0	0	0	0	0	7	4	1
5952	0	68	0	0	0	2	1	10	5	0	0	2	0	0	14	0	4	6	0	0	0	0	144	0	0	0	0	28	0	0	0	0	0	9	0	0	0	0	1	0	1	0	0	0	0	0	8	3	3
5953	0	85	0	0	0	0	2	0	3	0	0	0	0	0	3	0	2	4	0	0	0	0	23	0	0	0	0	1	0	0	0	0	0	88	0	0	0	0	0	0	2	0	0	0	0	0	4	0	1
5954	0	14	0	0	0	0	0	5	0	0	0	0	0	0	2	0	4	41	0	0	0	0	54	0	0	0	0	1	1	2	0	0	0	16	0	0	0	0	0	2	0	0	0	0	0	0	4	1	1
5955	0	6	0	0	0	3	0	8	4	0	0	0	0	0	2	0	3	45	0	0	0	0	350	0	0	0	0	5	5	1	0	0	0	0	0	0	0	0	0	0	1	0	0	0	0	0	4	0	2
5956	0	108	0	1	0	0	0	2	2	0	2	0	0	0	1	0	3	16	0	0	0	0	24	0	0	0	0	0	0	0	0	0	0	0	0	0	0	0	2	0	0	0	0	0	0	0	10	0	0
5957	0	10	0	0	0	0	0	0	0	0	0	0	0	0	7	0	5	25	0	0	0	0	125	0	0	0	0	9	0	0	0	0	0	200	0	0	0	0	7	0	0	0	0	0	0	0	0	0	1
5958	0	97	0	0	0	0	0	0	2	0	0	0	0	0	2	0	7	14	0	0	0	0	14	0	0	0	0	3	0	0	0	0	0	16	0	0	0	0	0	0	0	0	0	0	0	0	1	0	2
5959	0	800	0	0	0	2	0	6	9	0	0	0	0	1	0	0	2	25	0	0	0	0	130	0	0	0	0	0	0	0	0	0	0	0	0	0	0	2	0	0	0	0	0	0	0	0	40	3	1
5960	0	10	0	2	0	0	0	3	0	1	1	0	0	0	0	0	3	35	0	0	0	0	10	0	0	0	0	50	0	0	0	0	0	20	0	0	0	0	1	0	0	0	0	0	0	0	4	0	0
5961	0	34	0	0	0	0	0	6	0	0	1	0	0	0	0	0	1	27	0	0	0	0	14	0	0	0	0	0	1	2	0	1	0	23	0	0	0	1	0	0	0	0	0	0	0	0	1	0	0
6349	0	5	0	0	0	1	0	7	0	0	0	0	0	0	0	0	5	15	0	0	0	0	309	0	0	0	0	0	0	0	0	0	0	0	0	0	0	0	0	0	0	0	0	0	0	0	2	0	1
6350	0	4	0	0	0	0	0	7	0	3	0	0	0	0	6	0	6	26	0	0	0	0	140	0	0	1	0	0	1	0	0	0	0	2	0	0	0	0	2	0	2	0	0	0	0	0	1	0	1
6351	0	13	0	0	0	1	1	7	1	0	0	0	0	0	2	0	7	14	0	0	0	0	99	0	0	0	0	3	0	0	0	0	0	16	0	0	0	0	0	0	0	0	0	0	0	0	0	0	2
6352	0	5	0	0	0	0	0	2	0	0	0	0	0	0	6	0	1	39	0	0	0	2	74	0	0	0	0	2	3	2	0	0	0	0	0	0	0	0	0	0	0	0	0	0	1	0	0	0	0
6353	0	30	0	0	0	0	0	1	0	0	0	0	0	0	1	0	1	28	0	0	0	0	50	0	0	0	0	5	3	1	0	0	0	0	0	0	0	0	0	0	0	0	0	0	0	0	0	1	1
6354	0	0	0	0	0	0	0	16	2	0	0	0	0	0	0	0	1	39	0	0	0	0	93	0	0	0	0	2	0	0	0	0	0	0	0	0	0	0	0	0	0	0	0	0	0	0	2	0	1
6355	0	60	0	0	0	0	0	1	2	0	0	0	0	0	1	0	3	12	0	0	0	0	24	0	0	0	0	0	0	0	0	0	0	43	0	0	0	0	0	0	0	0	0	0	0	0	2	2	1
6356	0	0	0	0	0	0	0	18	0	1	0	0	0	1	18	0	2	44	0	0	0	0	400	0	0	0	0	8	3	5	0	0	0	0	0	0	0	2	1	2	0	0	0	0	4	0	3	1	3
6357	0	5	0	0	0	0	0	9	0	0	0	0	0	0	21	0	4	39	0	0	0	0	74	0	0	0	0	28	2	3	0	0	0	0	0	0	0	0	0	1	0	0	0	0	0	0	2	2	0
6358	0	2	0	0	0	0	0	8	1	0	3	0	0	0	7	0	6	11	0	0	0	0	28	0	0	0	0	220	0	1	0	0	0	0	0	0	0	0	1	0	0	0	0	0	0	0	0	0	0
6359	0	24	0	0	0	0	0	2	5	0	2	0	0	0	5	0	4	26	0	0	0	0	127	0	0	0	0	33	0	1	0	0	0	16	0	0	0	0	1	0	0	0	0	0	0	0	1	1	2
6360	0	5	0	0	0	0	0	7	0	0	0	0	0	0	2	0	4	28	0	0	0	0	124	0	0	0	0	65	0	0	0	0	0	0	0	0	0	0	0	0	0	0	0	0	0	0	1	0	1
6361	0	18	0	0	0	1	0	1	0	0	1	0	0	0	6	0	3	56	0	0	0	0	100	0	0	0	0	1	0	1	0	0	0	6	0	0	0	2	0	0	0	0	0	0	0	0	0	0	1
6362	0	33	0	0	0	0	0	4	2	0	1	0	0	0	8	0	7	18	0	0	0	0	86	0	0	0	0	0	1	0	0	0	0	21	0	0	0	0	5	0	1	0	0	0	0	0	2	3	1
6363	0	17	0	0	0	0	0	3	2	0	0	0	0	0	1	0	2	37	0	0	0	0	92	0	0	0	0	2	0	3	0	0	0	5	0	0	0	0	5	0	0	0	0	0	0	0	2	1	3
6364	0	18	0	0	0	0	0	8	2	0	0	0	0	0	6	0	4	40	0	0	0	0	80	0	0	0	0	0	0	8	0	0	0	12	0	0	0	0	1	1	0	0	0	0	0	0	0	3	0
6365	0	2	0	0	0	0	0	8	0	0	0	0	0	0	4	0	1	29	0	0	0	0	93	0	0	0	0	0	0	2	0	0	0	1	0	0	0	2	0	0	0	0	0	0	0	0	0	0	0
6366	0	200	0	0	0	0	0	3	0	0	0	0	0	0	12	0	2	12	0	0	0	0	49	0	0	0	0	24	0	0	0	0	0	5	0	0	0	0	2	0	0	0	0	0	0	0	0	0	4
6367	0	0	0	0	0	0	0	0	0	0	0	0	0	0	0	0	10	18	0	0	0	0	21	0	0	0	0	12	0	5	0	0	0	10	0	0	0	0	1	2	0	0	0	0	0	0	0	1	1
6368	0	50	0	0	0	0	1	12	1	0	0	0	0	0	2	0	7	30	0	0	0	0	91	0	0	0	0	1	6	0	0	0	0	3	0	0	0	0	0	0	0	0	0	0	0	0	0	1	4
6369	0	6	1	0	0	0	0	5	1	0	0	0	0	0	7	0	2	51	0	0	0	0	50	0	0	0	0	7	0	2	0	0	0	0	0	0	0	2	1	2	0	0	0	0	0	0	0	4	17
6370	0	11	0	0	0	1	0	7	0	0	0	0	0	0	3	0	1	54	0	0	0	0	78	0	0	0	0	1	0	5	0	0	0	4	0	0	0	1	0	4	0	0	0	0	0	0	0	1	1
6371	0	43	0	0	0	6	12	6	0	0	0	0	0	0	12	0	7	13	0	0	0	0	12	0	0	0	0	2	0	0	0	0	0	61	0	0	0	0	1	0	0	0	0	0	0	0	0	0	2
6372	0	16	0	0	0	0	0	3	0	0	0	0	0	0	4	0	1	64	0	0	0	0	88	0	0	0	0	1	2	12	0	0	0	13	0	0	0	0	0	3	0	0	0	0	0	0	2	2	0
6373	0	25	0	0	0	5	0	6	0	0	0	0	0	0	4	0	7	28	0	0	0	0	19	0	0	0	0	26	0	1	0	0	0	6	0	0	0	0	2	1	1	0	0	0	0	0	0	0	3
6374	0	15	0	0	0	0	0	0	0	0	0	0	0	0	6	0	6	36	0	0	0	0	28	0	0	0	0	2	0	2	0	0	0	0	0	0	0	0	0	1	0	0	0	0	0	0	0	0	0
6375	0	20	0	0	0	0	0	0	0	0	0	0	0	0	0	0	2	15	0	0	0	0	30	0	0	0	0	16	0	0	0	0	0	0	0	0	0	0	0	0	0	0	0	0	0	0	0	1	1
6376	0	22	0	0	0	0	0	1	1	0	0	0	0	0	1	0	3	19	0	0	0	0	25	0	0	0	0	1	1	2	0	0	0	10	0	0	0	0	0	0	0	0	0	0	0	0	1	3	1
6377	0	350	0	0	0	8	0	3	2	0	0	0	0	0	1	0	1	40	0	0	0	0	40	0	0	0	0	0	2	10	0	0	0	9	0	0	0	0	1	0	0	0	0	0	0	0	0	0	4
6378	0	11	0	0	0	0	3	30	4	0	0	0	0	0	7	0	4	34	0	0	0	0	0	0	0	0	0	0	0	0	0	0	0	80	0	0	0	0	0	0	1	0	0	0	0	0	0	2	0
6379	0	120	0	0	0	1	0	7	0	0	0	0	0	0	0	0	0	14	0	0	0	0	45	0	0	0	0	0	0	0	0	1	0	235	0	0	0	0	2	0	0	0	0	0	0	0	0	3	0
6380	0	63	0	0	0	0	0	7	0	0	0	0	0	0	0	0	0	0	0	0	0	0	152	0	0	0	0	0	0	0	0	0	0	82	0	0	0	0	0	0	0	0	0	0	0	0	2	0	1
6381	0	65	0	0	0	0	0	0	1	0	0	0	0	0	5	0	6	3	0	0	0	0	90	0	0	0	0	75	0	0	0	0	0	0	0	0	0	0	0	2	0	1	0	0	0	0	0	0	0
6382	0	9	0	0	0	0	0	13	0	0	0	0	0	0	0	0	3	42	0	0	0	0	128	0	0	0	0	0	0	2	0	0	0	588	0	0	0	0	0	0	0	0	0	0	0	0	0	0	0
6383	0	0	0	0	0	1	0	10	1	0	0	0	0	0	3	0	1	54	0	0	0	0	500	0	0	0	0	0	0	13	0	0	0	1500	0	0	0	2	0	0	1	0	0	0	0	0	0	0	0
6384	0	105	0	0	0	0	0	6	0	0	0	0	0	0	4	0	0	27	0	0	0	0	47	0	0	0	0	0	1	4	0	1	0	5	0	0	0	0	0	0	0	0	0	0	0	0	5	1	1
6385	0	30	0	0	0	0	0	2	0	0	0	0	0	0	1	0	2	10	0	0	0	0	36	0	0	0	0	0	0	2	0	0	0	0	0	0	0	0	1	0	0	0	0	0	0	0	2	1	0
6386	0	316	0	0	0	0	11	3	8	0	4	0	0	0	1	0	0	11	0	0	0	0	155	0	0	0	0	70	0	0	0	0	0	49	0	0	0	3	2	0	1	0	0	0	0	0	1	0	0
6387	0	6	0	0	0	5	0	1	7	0	0	0	0	0	0	0	0	110	0	0	0	0	22	0	0	0	0	0	0	0	0	1	0	0	0	0	0	0	0	0	0	0	0	0	0	0	0	0	0
6388	0	53	0	0	0	0	0	3	0	0	0	0	0	0	4	0	0	0	0	0	0	0	17	0	0	0	0	0	0	0	0	0	0	0	0	0	0	0	0	0	0	0	0	0	0	0	0	0	0
6389	0	95	0	0	0	4	1	2	2	0	0	0	0	0	0	0	21	10	0	0	0	0	89	0	0	0	0	13	0	1	0	0	0	69	5	0	0	0	0	0	0	0	0	0	0	0	0	1	0
6390	0	69	0	0	0	3	2	2	1	0	1	0	0	0	2	0	1	10	0	0	0	0	31	0	0	0	0	5	0	0	0	0	0	40	0	0	0	0	0	0	1	0	0	0	2	0	0	1	1
6391	0	29	0	0	0	7	0	14	0	0	0	0	0	0	3	0	4	10	0	0	0	0	44	0	0	0	0	9	1	0	0	0	0	3	0	0	0	0	0	0	0	0	0	0	0	0	0	2	0
6392	0	10	0	0	0	0	0	1	0	0	0	0	0	0	3	0	1	20	0	0	0	0	35	0	0	0	0	18	1	5	0	0	0	37	0	0	0	3	0	0	0	0	0	0	0	0	0	0	0
6393	0	28	0	0	0	0	0	1	0	0	0	0	0	0	2	0	1	18	0	0	0	0	82	0	0	0	0	0	0	2	0	0	0	35	0	0	0	0	0	0	0	0	0	0	0	0	2	0	0
6394	0	35	0	0	0	0	0	7	0	0	0	0	0	0	0	0	3	15	0	0	0	0	58	0	0	0	0	0	1	3	0	0	0	8	0	0	0	0	0	3	0	0	0	0	0	0	0	0	0
6395	0	2	0	0	0	0	3	7	13	0	0	0	0	0	7	0	1	17	0	0	0	0	24	0	0	0	0	0	7	0	0	0	0	0	1	0	0	0	1	0	0	0	0	0	2	0	0	1	0
6396	0	75	0	0	0	0	0	0	1	0	0	0	0	0	6	0	6	12	0	0	0	0	69	0	0	0	0	0	0	0	0	0	0	55	0	0	0	0	0	1	0	0	0	0	0	0	0	0	0
6397	0	38	0	0	0	0	0	1	0	0	0	0	0	0	0	0	1	27	0	0	0	0	79	0	0	0	0	0	1	6	0	0	0	7	0	0	0	5	0	0	1	0	0	0	0	0	0	0	1
6398	0	46	0	0	0	0	1	1	1	0	2	0	0	0	0	0	2	6	0	0	0	0	27	0	0	0	0	0	0	1	0	0	0	21	0	0	0	0	1	0	0	0	0	0	0	0	0	0	0
6399	0	12	0	0	0	0	0	2	0	0	0	0	0	0	0	0	1	17	0	0	0	0	61	0	0	0	0	1	0	0	0	0	0	28	0	0	0	0	0	0	0	0	0	0	0	0	0	0	1
6400	0	1	0	0	0	0	0	1	0	0	0	0	0	0	4	0	0	6	0	0	0	0	44	0	0	0	0	0	0	0	0	0	0	0	0	0	0	0	0	0	0	0	0	0	0	0	0	0	1
6401	0	71	0	0	0	0	0	0	0	0	0	0	0	0	2	0	5	8	0	0	0	2	50	0	0	0	0	7	0	0	0	0	0	0	0	0	0	0	0	0	0	0	0	0	0	0	2	2	1
6402	0	28	0	0	0	0	0	3	3	0	1	0	0	0	5	0	4	9	0	0	0	0	107	0	0	0	0	2	0	0	0	0	0	4	0	0	0	0	0	1	0	0	0	0	0	0	0	0	5
6403	0	17	0	0	0	1	0	2	1	0	0	0	0	0	0	0	5	45	0	0	0	0	90	0	0	0	0	0	1	3	0	0	0	31	0	0	0	4	0	2	1	0	0	0	0	0	0	0	1
6404	0	18	0	0	0	1	0	7	0	0	0	0	0	0	1	0	2	5	0	0	0	0	65	0	0	0	0	0	0	3	0	0	0	1502	0	0	0	2	0	0	2	0	0	0	0	0	0	3	0
6405	0	41	0	0	0	0	0	3	6	0	0	0	0	0	0	0	0	9	0	0	0	0	22	0	0	0	0	0	0	2	0	1	0	0	25	0	0	0	0	0	0	0	0	0	0	0	0	1	0
6406	0	19	0	0	0	2	3	4	0	0	0	0	0	0	0	0	6	2	0	0	0	0	44	0	0	0	0	0	0	0	0	0	0	12	0	0	0	0	0	0	1	0	0	0	0	0	0	0	3
6407	0	68	0	0	0	1	0	8	2	0	0	0	0	0	1	0	0	18	0	0	0	0	11	0	0	0	0	0	0	1	0	1	0	0	0	0	0	5	0	0	1	0	0	0	0	0	0	1	1
6408	0	29	0	0	0	0	0	14	1	0	0	0	0	0	4	0	3	83	0	0	0	0	67	0	0	0	0	20	0	0	0	0	0	0	0	0	0	0	0	1	1	0	0	0	0	0	2	0	0
6409	0	28	0	0	0	0	0	7	0	0	0	0	0	0	1	0	4	10	0	0	0	0	50	0	0	0	0	0	0	0	0	0	0	2	0	0	0	0	0	0	0	0	0	0	0	0	2	0	2
6410	0	65	0	0	0	1	0	5	3	0	0	0	0	0	0	0	3	8	0	0	0	0	79	0	0	0	0	2	0	0	0	0	0	22	0	0	0	3	0	0	0	0	0	0	0	0	0	0	2
6411	0	0	0	0	0	0	0	8	0	0	0	0	0	0	0	0	11	76	0	0	0	0	45	0	0	0	0	1	0	4	0	0	0	10	0	0	0	1	0	1	0	0	0	0	0	0	0	0	2
6412	0	99	0	0	0	0	6	32	0	0	0	0	0	0	16	0	1	34	0	0	0	0	52	0	0	0	0	0	1	0	0	0	0	0	0	0	0	0	1	0	0	0	0	0	0	0	0	0	0
6413	0	29	0	0	0	0	0	7	0	0	0	0	0	0	4	0	2	37	0	0	0	0	43	0	0	0	0	0	1	12	0	0	0	0	0	0	0	1	0	2	2	0	0	0	0	0	0	2	0
6414	0	70	0	0	0	0	0	5	0	0	0	0	0	0	0	0	3	4	0	0	0	0	185	0	0	0	0	27	0	11	0	0	0	73	0	0	0	0	0	2	0	0	0	0	0	0	0	0	5
6415	0	13	0	0	0	0	0	10	1	0	0	0	0	0	6	0	2	36	0	0	0	0	74	0	0	0	0	0	1	8	0	0	0	1	0	0	0	3	0	2	1	0	0	0	0	0	0	1	0
6416	0	125	0	0	0	0	0	7	2	0	3	0	0	0	0	0	1	7	0	0	0	0	0	0	0	0	0	0	0	0	0	0	0	0	0	0	0	0	3	0	0	0	0	0	0	0	0	1	0
6417	0	226	0	0	0	0	0	2	0	0	0	0	0	0	0	0	0	10	0	0	0	0	0	0	0	0	0	23	0	0	0	0	0	2	0	0	0	0	0	0	1	0	0	0	0	0	1	0	0
6418	0	0	0	0	0	0	0	2	0	0	0	0	0	0	0	0	2	31	0	0	0	0	68	0	0	0	0	8	0	3	0	0	0	9	0	0	0	0	0	1	0	0	0	0	0	0	0	0	0
6419	0	38	0	0	1	0	1	7	1	0	0	0	0	0	1	0	4	4	0	0	0	0	7	0	0	0	0	0	0	0	0	0	0	0	0	0	0	0	1	0	0	0	0	0	0	0	0	0	0
6420	0	101	0	0	0	4	0	6	0	0	0	0	0	0	0	0	3	28	0	0	0	0	16	0	0	0	0	14	1	0	0	0	0	33	0	0	0	0	1	0	0	0	0	0	0	0	0	0	15
6421	0	140	0	1	0	0	0	8	0	0	0	0	0	0	0	0	2	87	0	0	0	0	68	0	0	0	0	0	0	0	0	0	0	100	0	0	0	0	0	0	0	0	0	0	0	0	0	0	0
6422	0	83	0	0	0	0	0	2	0	0	0	0	0	0	3	0	0	26	0	0	0	0	80	0	0	0	0	0	0	5	0	0	0	0	0	0	0	0	0	0	0	0	0	0	0	0	0	0	0
6423	0	250	0	0	0	1	0	2	0	0	0	0	0	0	18	0	3	13	0	0	0	0	0	0	0	0	0	1	0	0	0	0	0	4	0	0	0	0	0	1	0	0	0	0	0	0	1	0	0
6511	0	4	0	0	0	0	0	0	0	0	0	0	0	0	18	0	0	0	0	0	0	0	7	0	0	0	0	0	0	17	0	0	0	0	0	0	0	0	0	7	0	0	0	0	0	0	0	1	0
6512	0	4	0	0	0	4	0	0	0	0	5	0	0	2	7	0	10	33	0	0	100	0	5	0	0	0	0	0	2	0	0	0	0	5	0	0	0	0	1	0	2	0	0	0	0	0	0	1	1
6513	0	322	0	0	0	14	0	0	0	2	0	0	0	0	3	0	0	0	0	0	0	0	2	0	0	0	0	3	0	0	0	0	0	206	0	0	0	0	1	0	0	0	0	0	0	0	5	1	0
6514	0	50	0	0	0	0	0	0	4	1	0	0	0	0	45	0	10	7	0	0	0	0	0	0	0	0	0	12	1	0	0	0	4	100	0	0	0	0	1	0	0	0	0	0	0	0	11	0	0
6515	0	26	0	0	0	0	0	0	0	1	0	0	0	0	0	0	3	4	0	0	0	0	75	0	0	0	0	0	2	0	0	0	0	100	0	0	0	0	1	0	0	0	0	0	0	0	1	1	0
6516	0	405	0	0	0	9	0	0	9	0	0	0	0	0	37	0	8	39	0	0	0	0	76	0	0	0	0	0	0	0	0	0	0	88	6	0	0	0	0	0	2	0	0	0	7	0	0	2	0
6517	0	100	0	0	0	20	0	0	2	1	0	2	0	0	0	0	0	5	0	0	0	0	0	0	0	0	0	0	7	0	0	0	0	400	0	0	0	0	0	0	0	0	0	0	0	0	0	1	0
6518	0	244	0	0	0	73	0	0	1	0	0	0	0	0	0	0	0	10	0	0	0	0	9	0	0	0	0	0	0	12	0	0	0	48	0	0	0	0	0	0	0	0	0	0	32	0	0	0	1
6519	0	48	0	0	0	7	0	0	7	1	0	0	0	0	9	0	4	51	0	0	0	0	41	0	0	0	0	11	0	31	0	0	0	0	0	0	0	0	0	0	0	0	0	0	0	0	0	0	1
6520	0	2000	0	0	0	4	0	0	0	2	0	0	0	0	10	0	0	20	0	0	0	0	0	0	0	0	0	100	2	0	0	0	0	100	0	0	0	0	1	0	0	0	0	0	0	0	0	0	1
6521	0	26	0	0	0	3	0	0	0	3	0	3	0	0	0	0	10	0	0	0	0	0	0	0	2	0	0	0	0	0	0	0	0	20	0	0	1	0	1	0	2	0	0	0	0	0	0	1	0
6522	0	1230	0	0	0	5	0	67	9	1	0	0	0	0	20	14	14	42	0	0	0	0	36	0	0	0	0	15	0	314	0	0	0	936	0	0	0	0	0	23	1	0	0	0	2	0	0	0	0
6523	0	139	0	0	0	0	0	0	0	1	0	0	0	0	9	0	5	40	0	0	0	0	7	0	0	0	0	0	0	26	0	0	0	0	0	0	0	0	2	0	0	0	0	0	0	0	0	1	0
6524	0	15	0	0	0	1	0	2	1	1	1	0	0	0	0	0	4	5	0	0	0	0	12	0	0	0	0	0	0	0	0	0	0	0	0	0	0	0	0	0	1	0	0	0	0	0	18	2	0
6525	0	200	0	0	0	0	0	0	0	0	0	0	0	0	0	0	2	5	0	0	0	0	0	0	0	0	0	0	0	0	0	0	0	0	0	0	0	0	0	0	0	0	0	0	0	0	0	0	0
6526	0	22	1	0	0	7	0	0	0	1	0	0	0	0	0	0	0	5	0	0	0	0	140	0	0	0	0	0	1	0	0	0	0	50	0	0	0	0	0	0	0	0	0	0	0	0	0	1	0
6527	0	259	0	0	0	0	0	67	0	1	0	0	0	0	31	0	5	43	0	0	0	0	116	0	0	0	0	8	0	29	0	0	0	18	0	0	0	0	0	346	0	0	0	0	4	0	1	0	1
6528	0	560	0	0	0	7	12	42	0	1	0	0	0	0	16	0	12	33	0	0	0	0	206	0	0	0	0	0	0	32	0	0	0	112	0	0	0	0	0	32	0	0	0	0	0	0	4	0	0
6529	0	60	0	0	0	0	0	0	0	0	0	0	0	1	10	0	7	5	0	0	0	0	0	0	0	0	0	1	0	0	0	0	0	0	0	0	0	0	1	0	0	0	0	0	0	0	0	2	0
6530	0	0	0	0	0	1	0	9	0	0	0	0	0	0	0	0	2	33	0	0	0	0	10	0	0	0	0	0	0	0	0	0	0	0	1	0	0	0	0	0	2	0	0	0	0	0	0	0	1
6531	0	95	0	0	0	1	0	3	0	0	0	0	0	0	0	0	6	7	0	0	0	0	100	0	0	0	0	0	0	2	0	0	0	75	0	0	0	0	0	0	4	0	0	0	0	0	0	2	0
6532	0	17	0	0	0	0	2	0	0	0	0	0	0	0	3	0	0	3	0	0	0	0	2	0	0	0	0	0	2	0	0	0	0	0	0	0	0	4	0	0	0	0	0	0	0	0	3	1	0
6533	0	240	0	0	0	0	0	7	6	1	0	0	0	0	0	0	0	9	0	0	0	0	350	0	0	0	0	0	2	0	0	0	0	400	0	0	0	0	0	0	0	0	0	0	0	0	5	0	0
6534	0	534	0	0	0	0	7	71	0	2	0	0	0	0	2	0	11	12	0	0	0	0	64	0	0	0	0	15	0	317	0	0	0	0	0	0	0	0	0	43	2	0	0	0	0	0	0	1	0
6535	0	1	0	0	0	0	0	9	0	0	0	0	0	0	3	0	0	4	0	0	0	0	450	0	0	0	0	2	0	0	0	0	0	0	0	0	0	0	0	0	1	0	0	0	0	0	0	0	0
6536	0	12	0	0	0	2	0	3	0	0	0	0	0	0	15	0	0	0	0	0	0	0	25	0	0	0	0	0	0	8	0	0	0	5	0	0	0	0	0	0	0	0	0	0	0	0	0	2	0
6537	0	21	0	0	0	0	0	10	0	0	0	0	0	1	10	0	7	20	0	0	0	0	0	6	0	0	0	0	0	7	0	0	0	0	0	0	0	0	0	0	2	0	0	0	0	0	0	0	2
6538	0	6	0	0	0	1	0	5	0	0	0	0	0	0	0	0	0	0	0	0	0	0	60	0	0	0	0	0	0	4	0	0	0	0	0	0	0	0	0	0	0	0	0	0	0	0	0	0	0
6539	0	90	1	0	0	0	0	3	0	0	0	0	0	0	30	0	1	11	0	0	0	0	50	0	0	0	0	2	0	0	0	0	0	40	0	0	0	0	1	0	0	0	0	0	0	0	0	2	1
6540	0	200	0	0	0	0	0	0	0	1	0	2	0	0	0	0	6	20	0	0	0	0	0	0	0	0	0	0	0	0	0	0	0	15	0	0	0	0	0	0	0	0	0	0	0	0	45	1	0
6541	0	35	0	0	0	0	0	0	0	1	0	0	0	0	60	0	0	1	0	0	0	0	0	0	0	0	0	2	13	1	0	0	0	0	0	2	0	3	0	0	1	0	0	0	0	0	0	3	1
6542	0	180	0	0	0	0	0	0	0	0	0	0	0	0	40	0	0	2	0	0	0	0	0	0	0	0	0	4	0	0	0	0	0	30	0	0	0	0	0	0	0	0	0	0	0	0	100	1	1
6543	0	11	0	0	0	0	0	9	0	1	0	0	0	1	4	0	0	1	0	0	0	0	33	0	0	0	0	3	0	18	0	0	0	0	0	0	0	0	0	25	0	0	0	0	0	0	0	2	2
6544	0	5	0	0	0	0	0	5	0	0	0	0	0	0	0	0	2	13	0	0	0	0	95	0	0	0	0	0	0	5	0	0	0	0	0	0	0	1	0	0	0	0	0	0	0	0	0	0	1
6545	0	20	0	0	0	0	0	0	4	0	0	0	0	0	60	0	0	3	0	0	0	0	0	0	0	0	0	0	0	0	0	0	0	0	0	0	0	0	0	0	2	0	0	0	0	0	0	3	0
6980	0	122	0	0	0	3	0	24	2	0	0	0	0	0	16	0	0	40	0	0	0	0	18	1	0	0	0	0	1	4	0	0	0	48	0	0	0	0	0	0	2	0	0	0	2	0	0	0	0
6981	0	27	0	0	0	0	0	4	0	0	1	0	0	0	1	0	0	16	0	0	0	0	2	0	0	0	0	0	0	1	0	0	0	1	0	0	0	0	0	0	0	0	0	0	0	0	3	0	0
6982	0	232	0	0	0	3	0	25	5	0	0	0	0	0	3	0	1	25	0	0	0	0	20	0	0	0	0	1	1	2	0	0	0	33	0	0	0	2	1	3	0	0	1	0	0	0	0	0	1
6983	0	36	0	0	0	50	0	2	9	0	1	0	0	0	0	0	1	7	0	120	0	0	94	0	0	0	0	1	0	0	0	0	0	36	0	0	0	0	0	0	0	0	0	0	0	0	0	0	1
6984	0	230	0	0	0	2	0	12	0	1	0	0	0	0	0	0	4	30	0	150	0	0	23	0	0	0	0	32	0	0	0	0	0	30	0	0	0	0	0	2	1	0	0	0	0	0	0	1	1
6985	0	5	0	0	0	0	0	6	0	0	0	0	0	0	1	0	3	6	0	0	0	0	0	0	0	0	0	3	0	0	0	0	3	0	0	0	0	0	0	0	0	0	0	0	0	0	0	0	0
6986	0	2	0	0	0	0	0	4	0	0	0	0	0	0	0	0	1	29	0	0	0	0	18	0	0	0	0	0	0	0	0	0	0	0	0	0	0	0	1	0	0	0	0	0	0	0	6	0	0
6987	0	91	0	0	0	2	0	10	0	0	1	0	0	0	0	0	5	33	0	0	0	0	13	0	0	0	0	0	0	0	0	0	0	22	0	0	0	1	0	0	0	0	0	0	0	0	0	2	0
6988	0	6	0	0	0	115	0	1	2	0	3	0	0	0	5	0	7	70	0	0	700	0	10	0	0	0	0	0	0	0	0	0	0	5	0	0	0	2	2	0	1	0	0	0	0	0	0	0	0
6989	0	8	0	0	0	26	0	14	0	0	1	0	0	0	0	0	2	56	0	0	0	0	43	0	0	0	0	1	0	9	0	0	0	69	0	0	0	0	0	0	0	0	0	0	0	0	0	2	0
6990	0	261	0	0	0	19	0	17	0	0	1	0	0	0	0	0	2	66	0	0	0	0	4	0	0	0	0	1	0	8	0	0	0	36	0	0	0	1	0	0	0	0	0	0	0	0	0	0	0
6991	1	0	0	0	0	300	0	17	0	0	3	0	0	0	9	0	2	54	0	0	60	0	39	0	0	0	0	0	0	3	0	1	0	0	0	0	0	0	0	0	0	0	0	0	3	0	0	0	1
6992	0	6	0	0	0	0	0	3	0	0	0	0	0	3	0	0	4	46	0	0	25	0	129	0	0	0	0	0	0	3	0	0	0	61	0	0	0	1	0	0	2	0	0	0	0	0	2	0	3
6993	0	27	0	0	0	11	0	5	4	0	1	0	0	0	30	0	4	55	0	0	0	0	218	5	0	0	0	0	0	6	0	0	0	204	0	0	0	2	0	0	0	0	0	0	0	0	4	0	2
6994	0	14	0	0	0	60	0	4	0	0	0	0	0	0	0	0	0	7	0	0	0	0	16	0	0	0	0	0	0	0	0	0	0	270	0	0	0	0	0	1	0	0	0	0	0	0	0	0	0
6995	0	16	0	0	0	18	0	45	0	0	0	0	0	0	1	0	7	169	0	0	0	0	263	0	0	0	0	67	3	9	0	0	0	55	0	0	0	7	0	6	2	0	0	0	3	0	0	0	0
6996	0	52	0	0	0	0	0	11	1	0	0	0	0	0	2	0	4	47	0	0	0	0	21	0	0	0	0	1	0	0	0	1	0	0	0	0	0	0	0	20	0	0	0	0	0	0	0	0	3
6997	0	50	0	0	0	10	0	4	2	0	1	0	0	0	12	0	0	58	0	60	0	0	190	0	0	0	0	0	0	0	0	0	0	3	0	0	0	0	0	0	0	0	0	0	0	0	2	1	1
6998	0	40	0	0	0	0	0	23	0	0	0	0	0	0	2	0	2	156	0	0	41	0	69	0	0	0	0	0	0	6	0	0	0	150	0	0	0	2	0	0	1	0	0	0	3	0	3	2	0
6999	0	55	0	0	0	0	0	3	0	0	0	0	0	0	13	0	0	49	0	0	0	0	53	0	0	0	0	8	0	1	0	0	0	42	0	0	0	2	0	0	0	0	0	0	3	0	0	0	0
7000	0	7	0	0	0	11	0	15	0	0	0	0	0	0	0	0	2	61	0	0	0	0	56	0	0	0	0	0	0	0	0	0	0	30	0	0	0	0	0	0	0	0	0	0	0	0	0	0	0
7001	0	65	0	0	0	3	0	16	0	0	0	0	0	0	4	0	1	84	0	0	0	0	95	0	0	0	0	0	1	3	0	0	0	221	0	0	0	0	0	2	0	0	0	0	1	0	1	1	3
7002	0	35	0	0	0	0	0	7	0	0	0	0	0	0	6	0	0	71	0	0	0	0	85	0	0	0	0	2	0	2	0	0	0	43	0	0	0	0	0	0	0	0	0	0	0	0	0	0	1
7003	0	65	0	0	0	0	0	2	0	0	0	0	0	0	1	0	1	36	0	0	10	0	32	0	0	0	0	1	0	0	0	0	0	50	0	0	0	1	1	1	0	0	0	0	0	0	1	0	1
7004	0	211	0	0	0	5	0	33	0	0	0	0	0	0	0	0	8	52	0	36	0	0	108	0	0	0	0	3	0	5	0	0	0	93	0	0	0	0	0	0	0	0	0	0	0	0	7	1	6
7005	0	0	0	0	0	2	0	9	1	0	0	0	0	0	1	0	2	72	0	0	0	0	35	0	0	0	0	0	0	7	0	0	0	20	0	0	0	2	1	0	2	0	0	0	0	0	0	1	1
7006	0	42	0	0	0	0	0	7	0	0	0	0	0	0	7	0	8	74	0	0	0	0	14	0	0	0	0	55	0	14	0	0	0	0	0	0	0	0	1	0	0	0	0	0	0	0	5	1	1
7007	0	4	0	0	0	5	0	5	0	0	0	0	0	0	0	0	5	28	0	0	0	0	15	0	0	0	0	1	0	9	0	0	0	146	0	0	0	3	0	3	2	0	0	0	0	1	0	3	2
7008	0	0	0	2	0	0	0	6	0	0	0	0	0	0	0	0	0	100	0	0	0	0	21	2	0	0	0	0	0	6	0	0	0	51	0	0	0	0	0	0	0	0	0	0	0	0	0	1	0
7009	0	8	0	0	0	0	0	17	0	0	0	0	0	0	2	0	2	104	0	0	0	0	290	0	0	0	0	20	5	0	0	0	0	0	0	0	0	3	0	1	0	0	0	0	0	0	0	2	1
7010	0	17	0	0	0	3	0	6	2	0	0	0	0	0	0	0	1	31	0	0	0	0	27	0	0	0	1	31	0	1	0	0	0	0	0	0	0	0	0	11	0	0	0	0	0	0	0	0	0
7011	0	16	0	1	0	0	0	6	0	0	0	0	0	0	0	0	5	61	0	0	0	0	3	0	0	0	1	0	0	1	0	0	0	94	0	0	0	3	0	1	2	0	0	0	1	0	0	1	0
7012	0	5	0	0	0	0	0	9	4	0	0	0	0	0	0	0	4	103	0	0	0	0	25	0	0	0	0	0	0	2	0	0	0	15	0	0	0	1	0	1	0	0	0	0	0	0	0	2	0
7013	0	2	0	0	0	0	0	5	2	0	0	0	0	0	2	0	6	50	0	0	0	0	55	0	0	0	0	4	0	3	0	0	0	67	0	0	0	0	0	0	2	0	0	0	0	0	0	0	2
7014	0	8	0	0	0	2	0	25	1	0	0	0	0	0	3	0	4	93	0	0	0	1	106	0	0	0	0	2	2	0	0	0	0	7	0	0	0	2	0	3	0	0	0	0	3	0	2	0	0
7015	0	50	0	0	0	0	0	16	4	0	0	0	0	0	0	0	0	65	0	0	0	0	55	0	0	0	0	0	0	8	0	0	0	20	0	0	0	0	0	2	0	0	0	0	0	0	0	0	0
7016	0	53	0	4	0	0	0	6	4	0	0	0	0	1	6	0	0	33	0	0	0	0	0	0	0	0	0	4	0	0	0	0	0	0	0	0	0	1	1	8	0	0	0	0	1	0	0	0	0
7017	0	65	0	0	0	0	0	28	0	0	0	0	0	0	0	0	0	0	0	0	0	0	36	0	0	0	0	13	0	0	0	0	0	0	0	0	0	0	0	0	0	0	0	0	0	0	0	0	0
7018	0	175	0	0	0	9	0	96	0	0	0	0	0	0	2	0	0	62	0	0	0	0	10	0	0	0	1	0	0	13	0	0	0	0	0	0	0	0	0	0	0	0	0	0	0	0	0	0	3
7019	0	0	0	0	0	0	0	220	0	0	0	0	0	1	25	0	1	177	0	0	0	0	500	0	0	0	1	1	1	5	0	1	0	60	0	0	0	0	0	0	0	0	0	0	0	0	0	0	0
7020	0	1	0	0	0	0	0	35	1	0	0	0	0	0	6	0	0	81	0	0	0	0	50	0	0	0	0	0	0	4	0	0	0	235	0	0	0	0	0	0	1	0	0	0	0	0	0	0	1
7021	0	15	0	0	0	0	0	10	1	0	0	0	0	0	0	0	5	12	0	0	0	0	70	0	0	0	0	0	0	0	0	0	0	0	0	0	0	0	0	0	0	0	0	0	0	0	0	0	6
7022	0	53	0	0	0	0	0	33	0	0	0	0	0	0	3	0	0	65	0	0	0	0	10	0	0	0	1	0	0	3	0	0	0	150	0	0	0	0	0	0	1	0	0	0	0	0	0	1	0
7023	0	80	0	0	0	0	0	48	0	0	0	0	0	0	1	0	2	48	0	0	0	0	0	0	0	0	2	0	0	3	0	2	0	130	0	0	0	0	0	0	0	0	0	0	0	0	0	0	1
7024	0	54	0	0	0	0	0	14	2	0	0	0	0	0	1	0	3	64	0	0	0	0	0	14	0	0	0	0	0	9	0	0	0	0	0	0	0	1	0	7	3	0	0	0	0	0	0	0	1
7025	0	105	0	0	0	1	0	65	3	0	1	0	0	0	3	0	1	172	0	0	200	0	335	0	0	0	0	0	7	0	0	0	0	127	0	0	0	0	0	1	0	0	0	0	2	0	1	2	1
7026	0	3	0	0	0	0	0	0	0	0	0	0	0	0	0	0	0	17	0	60	0	0	109	0	0	0	0	52	0	0	0	0	0	58	0	0	0	0	0	0	0	0	0	0	0	0	26	0	0
7027	0	30	0	0	0	0	0	9	0	0	0	0	0	0	0	0	0	42	0	0	0	0	61	0	0	0	0	0	0	3	0	0	0	137	0	0	0	0	0	0	0	0	1	0	0	0	2	1	0
7028	0	0	0	0	0	0	0	81	3	0	0	0	0	0	0	0	2	87	0	0	0	0	35	0	0	0	0	15	0	10	0	0	0	0	0	0	0	0	0	0	0	0	0	0	0	0	9	0	0
7029	0	90	0	0	0	0	0	60	6	0	0	0	0	0	0	0	2	75	0	0	275	0	67	0	0	0	0	40	3	2	0	0	0	135	0	0	0	1	1	0	3	0	0	0	9	0	19	5	9
7030	0	70	0	0	0	15	0	24	2	0	0	0	0	0	1	12	1	117	0	0	0	0	53	0	0	0	0	2	0	0	0	0	0	45	0	0	0	0	0	1	0	0	0	0	0	0	5	2	0
7031	0	500	0	0	0	1	0	9	3	0	0	0	0	0	4	0	0	15	0	300	0	0	418	0	0	0	0	0	0	0	0	0	0	181	0	0	0	0	0	1	0	0	0	0	0	0	2	0	1
7032	0	75	0	0	0	3	0	2	0	0	3	0	0	0	6	0	0	77	0	0	0	0	42	0	0	0	0	0	0	0	0	0	0	57	0	0	0	0	0	0	0	0	0	0	2	0	2	0	1
7033	0	38	0	0	0	1	0	8	2	0	1	0	0	0	0	0	4	48	0	0	0	0	38	0	0	0	0	0	0	2	0	0	0	89	0	0	0	0	0	0	0	0	0	0	0	0	6	1	1
7034	0	0	0	0	0	3	0	6	0	0	0	0	0	0	0	0	6	19	0	0	0	0	63	0	0	0	0	2	0	0	0	0	0	45	0	0	0	0	0	0	0	0	0	0	0	0	1	0	0
7035	0	41	0	0	0	0	0	3	0	0	0	0	0	0	0	0	1	35	0	0	0	0	44	0	0	0	0	11	0	0	0	0	0	0	0	0	0	1	2	0	0	0	0	0	0	0	0	0	0
7036	0	43	0	0	0	0	0	40	0	0	1	0	0	0	9	0	3	152	0	0	0	0	81	0	0	0	0	1	4	0	0	0	0	68	0	0	0	1	0	4	0	0	0	0	3	0	1	2	2
7037	0	37	0	0	0	0	0	0	2	0	0	0	0	0	0	0	3	62	0	0	100	0	38	0	0	0	0	0	1	0	0	0	0	74	0	0	0	0	2	0	0	0	0	0	0	0	0	0	0
7038	0	15	0	0	0	0	0	2	4	0	2	0	0	0	4	0	1	87	0	0	400	0	85	0	0	0	0	0	1	0	0	0	0	20	0	0	0	0	0	0	0	0	0	0	2	0	0	0	0
7039	0	32	0	0	0	21	0	3	2	0	0	0	0	0	0	0	1	35	0	0	85	0	24	0	0	0	0	35	0	6	0	0	0	199	0	0	0	0	1	0	0	0	0	0	0	0	0	1	0
7040	0	52	0	0	0	0	0	7	0	0	0	0	0	0	0	0	0	34	0	0	0	0	0	0	0	0	0	18	0	1	0	0	0	31	0	0	0	0	1	0	2	0	0	0	0	0	0	0	0
7041	0	34	0	0	0	4	0	12	3	0	0	0	0	0	3	0	2	130	0	0	0	0	11	0	0	0	0	2	0	0	0	0	0	86	0	0	0	3	0	0	0	0	0	0	4	0	1	3	0
7042	0	71	0	0	0	0	0	4	9	0	0	0	0	0	0	0	3	83	0	0	0	0	0	0	0	0	0	1	0	3	0	0	0	75	0	0	0	2	1	0	0	0	0	0	0	0	0	0	3
7043	0	66	0	0	0	1	0	2	0	0	3	0	0	0	1	0	0	5	0	0	0	0	81	0	0	0	0	9	0	0	0	0	0	10	0	0	0	0	1	0	0	0	0	0	0	0	6	1	0
7044	0	18	1	0	0	0	0	6	2	0	0	0	0	1	0	0	5	16	0	0	500	0	180	0	0	0	0	16	0	0	0	0	0	40	0	0	0	0	1	0	0	0	0	0	0	0	5	2	3
7045	0	33	0	0	0	0	0	23	2	0	0	0	0	0	4	0	2	95	0	0	25	0	33	0	0	0	0	2	0	0	0	0	0	141	0	0	0	1	0	1	0	0	0	0	2	0	0	2	6
7046	0	8	0	0	0	2	0	27	4	0	0	0	0	0	0	0	16	80	0	0	0	0	53	0	0	0	0	11	2	3	0	0	0	15	0	0	0	0	0	0	0	0	0	0	0	0	0	1	0
7047	0	0	0	0	0	0	0	8	0	0	0	0	0	0	0	0	2	51	0	0	4	0	369	0	0	0	0	1	2	3	0	0	0	115	0	0	0	0	0	0	0	0	0	0	8	0	0	0	1
7048	0	29	0	0	0	0	0	8	0	0	0	0	0	0	1	0	0	159	0	0	0	0	10	0	0	0	0	98	0	3	0	0	0	30	0	0	0	0	0	0	0	0	0	0	0	0	0	0	8
7049	0	8	0	0	0	2	0	19	1	0	0	0	0	0	0	0	4	154	0	0	25	0	187	0	0	0	0	4	2	0	0	0	0	70	0	0	0	0	1	3	0	0	0	0	2	0	2	1	4
7050	0	51	0	0	0	1	0	22	2	1	0	0	0	0	0	0	0	58	0	300	0	0	50	0	0	0	0	5	0	6	0	0	0	104	0	0	0	0	0	0	0	0	0	0	0	0	0	1	6
7051	0	21	0	0	0	1	0	6	1	0	1	0	0	0	0	0	0	72	0	0	0	0	107	0	0	0	0	8	0	0	0	0	0	0	0	0	0	0	0	1	0	0	0	0	6	0	0	1	1
7052	0	80	0	0	0	0	0	75	2	0	0	0	0	0	23	0	0	78	1	0	0	0	18	0	0	0	0	0	1	0	0	0	0	0	0	0	0	0	0	0	0	0	0	0	2	0	2	1	1
7053	0	17	0	0	0	17	0	3	12	0	0	1	0	0	0	0	4	18	0	0	168	0	37	0	0	0	0	1	0	0	0	0	0	89	0	0	0	0	0	0	0	0	0	0	6	0	14	0	1
7054	0	65	0	0	0	3	0	59	6	1	1	0	0	0	2	0	0	69	0	0	0	0	0	0	0	0	0	0	0	0	0	0	0	0	0	0	0	1	0	0	0	0	0	0	0	0	0	2	5
7152	0	30	0	0	0	0	0	6	6	1	0	0	0	0	0	0	12	6	0	0	0	0	0	0	0	0	0	0	1	0	0	0	0	0	0	0	0	0	0	0	2	0	0	0	0	0	0	2	0
7153	0	16	0	0	0	0	0	4	0	0	0	0	0	0	0	0	0	11	0	0	0	0	0	0	0	0	0	0	0	0	0	0	0	0	0	0	0	0	0	0	0	0	0	0	0	0	0	1	4
7154	0	14	0	0	0	0	0	8	11	1	0	0	0	0	5	0	1	15	0	0	0	0	0	0	0	0	0	0	1	0	0	3	0	0	0	0	0	0	1	0	0	0	0	0	0	0	0	1	1
7155	0	1000	0	0	0	0	0	5	1	0	1	4	0	1	0	0	0	53	0	0	0	0	0	0	0	0	0	0	0	0	0	0	0	70	0	0	0	0	1	0	0	0	0	0	0	0	0	4	0
7156	0	15	0	0	0	0	0	2	5	1	0	0	0	0	0	0	0	9	0	0	0	0	0	0	0	0	0	3	1	0	0	0	0	0	0	0	0	0	1	0	1	0	0	0	0	0	1	1	0
7157	0	90	0	0	0	0	0	6	3	0	0	0	0	0	0	0	4	5	0	0	0	0	0	0	0	0	0	15	4	0	0	0	105	50	0	0	0	0	2	0	2	0	0	0	0	0	30	1	1
7158	0	100	1	0	0	20	0	0	0	0	0	0	0	0	0	0	1	10	0	0	0	0	0	0	0	0	0	2	0	0	0	0	0	15	0	0	0	0	0	1	1	0	0	0	0	0	0	0	3
7159	0	60	0	0	0	0	0	0	0	0	0	0	0	0	0	0	1	10	0	0	0	0	0	0	0	0	0	0	0	0	0	0	0	140	0	0	0	0	2	0	0	0	0	0	0	0	11	0	0
7160	0	240	0	0	0	2	0	0	3	0	0	0	0	0	0	0	9	27	0	0	0	0	25	0	0	0	0	0	0	0	0	0	0	20	0	0	0	0	0	0	0	0	0	0	0	0	3	1	2
7161	0	1200	0	0	0	125	0	0	1	0	1	0	0	0	0	0	4	5	0	0	0	0	0	0	0	0	0	1	0	0	0	0	0	1100	0	0	0	0	1	0	1	0	0	0	0	0	0	0	2
7162	0	331	0	0	0	1	0	0	0	0	0	0	0	0	0	0	0	11	0	0	0	0	0	0	0	0	0	0	0	0	0	0	0	0	0	0	0	0	0	0	0	0	0	0	0	0	0	1	1
7163	0	57	0	0	0	0	0	0	0	1	0	0	0	0	2	0	5	8	0	0	0	0	0	0	0	0	0	0	0	0	0	0	0	0	0	0	0	0	0	0	0	0	0	0	0	0	45	0	0
7164	0	29	0	0	0	1	0	1	0	0	0	0	0	2	0	0	2	0	0	0	0	0	9	0	0	0	0	0	0	0	0	0	0	0	0	0	0	0	0	0	0	0	0	0	0	0	5	1	0
7165	0	68	0	0	0	0	0	0	0	0	0	0	0	1	2	0	0	6	0	0	0	0	0	0	0	0	0	0	0	0	0	0	0	0	0	0	0	1	0	0	0	0	0	0	0	0	0	0	1
7166	0	1000	0	0	0	0	0	0	0	1	0	0	0	0	15	0	0	85	0	0	0	0	20	0	0	0	0	0	0	0	0	0	0	1000	0	0	0	0	0	0	1	0	0	0	0	0	1	1	0
7167	0	10	0	0	0	0	0	2	2	0	0	0	0	0	3	0	7	12	0	0	0	0	7	0	0	0	0	0	0	0	0	0	0	0	0	0	0	0	0	0	2	0	0	0	0	0	0	0	0
7168	0	75	0	0	0	0	0	0	0	0	0	0	0	0	0	0	0	3	0	0	0	0	4	0	0	0	0	30	0	0	2	0	0	0	0	0	1	0	0	0	0	0	0	0	0	0	0	0	0
7169	0	5	0	0	0	0	0	0	0	0	0	0	0	0	5	0	9	34	0	0	0	0	0	0	0	0	0	0	0	0	0	0	0	12	0	0	0	0	1	0	2	0	0	0	0	0	3	1	0
7170	0	45	0	0	0	0	0	7	4	0	0	0	0	0	0	0	9	18	0	0	0	0	5	0	0	0	0	0	0	7	0	0	0	0	0	0	0	0	0	0	2	0	0	0	0	0	0	0	1
7171	0	45	0	0	0	0	0	36	0	0	0	0	0	0	2	0	1	30	0	0	0	0	0	0	0	0	0	0	0	4	0	0	0	0	0	0	0	0	0	0	0	0	0	0	0	0	0	0	0
7172	0	20	0	0	0	0	0	0	0	0	0	0	0	0	15	0	2	35	0	0	0	0	70	0	0	0	0	2	0	0	0	1	0	27	0	0	0	0	2	0	2	0	0	0	0	0	13	0	1
7173	0	500	0	0	0	4	0	5	0	1	0	6	0	1	10	0	10	80	0	0	0	0	110	0	0	0	0	0	0	0	0	0	0	300	0	0	0	0	0	0	2	0	0	0	0	0	0	0	1
7174	0	35	0	0	0	0	0	0	7	0	0	0	0	0	2	0	5	5	0	0	0	0	20	0	0	0	0	1	0	0	0	0	0	2	0	0	0	0	0	0	1	0	0	0	0	0	0	2	0
7175	0	19	0	0	0	0	0	1	0	0	0	0	3	0	2	0	2	1	0	0	0	0	0	0	0	0	0	0	0	1	0	0	0	46	0	0	0	0	1	0	0	0	0	0	0	0	0	0	1
7176	0	150	0	0	0	0	0	0	0	0	0	0	0	0	0	0	0	9	0	0	0	0	1	0	0	0	0	0	0	0	0	0	0	10	0	0	0	2	2	0	0	0	0	0	0	0	4	0	0
7177	0	16	0	2	0	0	0	5	0	0	0	0	0	0	0	0	6	12	0	0	0	0	0	0	0	0	0	0	0	0	0	0	0	14	0	0	0	0	0	0	2	0	0	0	0	0	7	0	0
7178	0	3	0	0	0	0	0	0	0	1	0	0	0	0	30	0	10	5	0	0	0	0	0	0	0	0	0	25	0	0	0	0	0	70	0	0	1	0	1	0	0	0	0	0	0	0	0	0	0
7179	0	250	0	0	0	0	0	2	0	0	0	0	0	0	0	0	0	3	0	0	0	0	31	0	0	0	0	11	0	2	0	0	0	352	0	0	0	0	3	0	0	0	0	0	0	0	10	0	0
7180	0	5	0	0	0	0	0	5	0	0	0	0	0	0	0	0	3	31	0	0	0	0	59	0	0	0	0	0	0	2	0	0	0	0	0	0	0	0	0	0	1	0	0	0	0	0	0	1	1
7181	0	90	0	0	0	0	0	0	0	0	0	0	0	0	95	0	7	18	0	0	0	0	220	0	0	0	0	0	0	0	0	0	0	405	0	0	0	0	0	0	0	0	0	0	0	0	0	1	0
7182	0	4	0	0	0	1	0	0	0	0	0	0	0	1	0	0	4	9	0	0	0	0	0	0	0	0	0	0	0	0	0	0	0	29	0	0	0	0	1	0	0	0	0	0	0	0	0	2	1
[truncated: 83 more columns]
